# Supplementary material
Source: ML conference proceedings conference paper supplement (https://aclanthology.org/D19-1536)
Supplement: Attachment [file D19-1536.Attachment.zip]

# Supplementary for: Text2Math: End-to-end Parsing Text into Math Expressions

Yanyan Zou and Wei Lu

StatNLP Research Group

Singapore University of Technology and Design

yanyan\_zou@mymail.sutd.edu.sg, luwei@sutd.edu.sg

This is the supplementary material of Zou and Lu (2019c).

## 1 Initial Lexicon

Following the recent work (Roy et al., 2016), we developed a high precision lexicon to translate the text to mathematical expressions, like “sum of  $q_1$  and  $q_2$ ” translates to “ $q_1 + q_2$ ”, “the difference of  $q_1$  and  $q_2$ ” translates to “ $q_1 - q_2$ ”, where  $q_1$  and  $q_2$  denote quantity placeholders. Such a lexicon is used to check the predictions of our model. If a problem text contains an entry of the lexicon but the prediction is not consistent with the translated expression, then we adopt the expression returned by the lexicon to rectify the prediction. Otherwise, the prediction made by our model is directly adopted.

## 2 Experiments

### 2.1 Datasets and Settings

**Datasets.** The AI2 dataset, originally released by (Hosseini et al., 2014; Zou and Lu, 2019a,b), consisting of 395 arithmetic word problems on addition and subtraction. Roy and Roth (2015) provided the IL dataset containing 562 elementary problems where all four basic math operators (namely addition, subtraction, multiplication and division) are covered. Additionally, we also evaluate our model on the equation parsing dataset (Roy et al., 2016), consisting of 385 sentences each of which is annotated with a math equation containing one or more variables. It is worth noting that for arithmetic word problems, we focus on mathematical relations among numbers and calculate numerical values of the predicted expressions. However, for equation parsing, there exist maximum two variables residing in an equation. We thus regard a predicted equation as a correct one

if it is mathematically equivalent to the gold equation (Roy et al., 2016).

**Baselines.** We compare our model, Seq2Math, against various prior systems, including template-based methods (Kushman et al., 2014; Hosseini et al., 2014), reasoning-based approaches (Roy et al., 2015), meaning-based methods (Liang et al., 2018) and works of (Roy and Roth, 2015; Koncel-Kedziorski et al., 2015) applying integer linear programming to find optimal solutions. As for equation parsing, Roy et al. (2016) designed three structured predictors with a high-precision lexicon to make decisions. Such predictors can be trained in a pipeline fashion (denoted as **Pipeline**) or jointly (denoted as **Joint**).

## References

- Mohammad Javad Hosseini, Hannaneh Hajishirzi, Oren Etzioni, and Nate Kushman. 2014. Learning to solve arithmetic word problems with verb categorization. In *Proceedings of EMNLP*, pages 523–533.
- Rik Koncel-Kedziorski, Hannaneh Hajishirzi, Ashish Sabharwal, Oren Etzioni, and Siena Dumas Ang. 2015. Parsing algebraic word problems into equations. *Transactions of the Association for Computational Linguistics*, 3:585–597.
- Nate Kushman, Yoav Artzi, Luke Zettlemoyer, and Regina Barzilay. 2014. Learning to automatically solve algebra word problems. In *Proceedings of ACL*.
- Chao-Chun Liang, Yu-Shiang Wong, Yi-Chung Lin, and Keh-Yih Su. 2018. A meaning-based statistical english math word problem solver. In *Proceedings of NAACL*.
- Subhro Roy and Dan Roth. 2015. Solving general arithmetic word problems. In *Proceedings of EMNLP*.
- Subhro Roy, Shyam Upadhyay, and Dan Roth. 2016. Equation parsing: Mapping sentences to grounded equations. In *Proc. of EMNLP*.

Subhro Roy, Tim Vieira, and Dan Roth. 2015. Reasoning about quantities in natural language. *Transactions of the Association for Computational Linguistics*, 3(1):1–13.

Yanyan Zou and Wei Lu. 2019a. Quantity tagger: A latent-variable sequence labeling approach to solving addition-subtraction word problems. In *Proceedings of ACL*.

Yanyan Zou and Wei Lu. 2019b. Supplementary material for quantity tagger: A latent-variable sequence labeling approach to solving addition-subtraction word problems. In *Proceedings of ACL*.

Yanyan Zou and Wei Lu. 2019c. Text2math: End-to-end parsing text into math expressions. In *Proceedings of EMNLP*.
